# Supplementary material
Source: publisher figshare collection journal article supplement (https://rs.figshare.com/ndownloader/files/12535364)
Supplement: Supplementary file 1 [file 12535364]

lookup_yn	stim_size	latency_sec	perc_of_time_lookingup	total_dist_moved	look_up_prior_yn	sq1	sq2	sq3	sq4	sq5	sq6	sq7	sq8	sq9	sq10	gender	age	pitch_casc	yaw_casc	roll_casc
1	5	2.7956	0.035185	27.732	0	3	6	6	7	2	7	1	7	6	5	1	24	0.26949	1.7421	0.21336
1	5	3.683	0.053704	27.808	0	1	4	4	7	1	7	1	6	4	7	1	22	0.035283	0.28698	0.03809
1	5	9.614	0.02037	26.196	0	1	2	6	7	2	4	2	3	7	4	1	21	0.088065	1.3893	0.062574
1	1	33.622	0.016667	19.633	0	1	4	5	7	4	6	1	1	2	6	1	23	0.015811	0.018315	0.0059578
1	15	3.239	0.075926	21.308	0	1	3	4	7	3	5	3	4	7	5	0	24	1.1868	3.4139	1.3724
1	15	3.9117	0.066667	19.966	1	1	6	NaN	7	5	6	2	4	7	7	1	18	1.9121	6.2391	0.72304
1	3	1.1167	0.07037	27.898	0	1	3	4	7	4	7	1	4	7	7	1	21	0.64203	1.8778	0.2742
1	10	2.0065	0.30741	29.018	1	2	4	7	7	1	4	1	5	7	2	0	30	1.0669	3.7695	0.35382
1	3	5.2532	0.014815	23.204	0	4	5	5	7	4	6	4	4	4	7	1	25	0.018891	0.11052	0.029872
1	15	2.4513	0.13889	26.021	1	1	2	4	7	2	4	2	3	7	2	1	20	2.0823	9.0763	1.0786
1	15	3.4504	0.062963	28.201	0	2	5	4	7	5	7	1	4	7	6	1	25	2.5385	6.9631	1.3879
1	15	5.142	0.057407	27.266	0	7	6	6	7	1	7	6	7	4	7	1	23	1.8345	1.688	0.47081
1	15	4.9107	0.10556	33.174	0	1	3	6	7	3	7	1	7	7	6	1	24	1.8713	5.9649	0.61056
1	5	7.5932	0.061111	21.683	1	1	3	2	7	5	4	4	1	6	7	0	25	0.069866	1.6175	0.11112
1	10	2.1196	0.25926	41.308	1	4	5	5	7	2	7	1	7	6	6	1	20	2.2442	4.7699	1.2039
1	3	3.1271	0.24444	29.86	0	2	4	6	6	2	6	1	2	7	4	1	22	0.0954	0.27474	0.068921
1	1	11.957	0.025926	13.637	1	1	5	5	7	2	4	6	7	7	5	0	22	0.0097638	0.062605	0.012373
1	10	1.1135	0.20926	43.261	0	3	4	4	7	4	7	1	2	7	6	1	20	3.6315	2.237	0.80899
1	5	2.5951	0.1037	27.414	0	1	4	7	7	2	3	1	3	7	4	1	20	0.37823	2.1334	0.25146
1	3	3.1268	0.072222	23.658	0	1	3	4	7	4	4	2	4	7	4	1	23	0.026357	0.1393	0.031037
1	2	40.683	0.02963	16.71	0	2	4	1	7	2	7	1	5	4	7	1	31	0.012986	0.023426	0.0074757
0	1	60	0	48.338	0	1	4	6	7	3	5	1	7	7	7	0	38	0.020119	0.080264	0.004297
1	15	4.1368	0.14259	25.483	0	6	5	7	7	2	5	4	5	7	7	1	25	2.608	4.2151	0.94293
1	1	3.5752	0.011111	27.092	0	1	3	5	7	3	5	2	3	4	4	1	20	0.038609	1.1304	0.034702
1	10	2.3453	0.055556	14.762	1	3	5	6	7	2	6	2	4	7	6	1	19	0.8205	2.2553	0.21073
1	10	3.6926	0.085185	25.679	0	4	5	7	7	2	7	1	2	7	7	1	23	1.4855	3.6951	0.60869
1	2	15.414	0.042593	65.574	0	1	3	3	7	2	7	1	7	7	7	1	23	0.10525	0.08364	0.061123
1	3	3.6837	0.07037	26.082	1	2	6	4	7	3	3	1	2	7	6	1	24	0.058062	0.67065	0.032424
1	10	2.1273	0.23519	30.415	0	2	3	4	6	6	4	3	1	7	7	1	27	3.0777	4.124	0.61515
1	5	2.9057	0.057407	24.502	0	7	6	6	7	1	7	1	7	7	7	0	27	0.40315	0.607	0.19234
1	5	3.462	0.033333	27.08	0	1	3	7	7	3	4	1	5	7	6	1	24	0.19746	2.272	0.25254
1	15	6.2518	0.068519	18.467	0	2	4	4	6	3	5	2	3	7	4	1	22	1.9551	6.5883	1.1369
1	3	2.1243	0.13148	29.128	0	1	4	3	7	3	2	5	2	7	7	1	25	0.23276	0.35524	0.8368
1	3	6.1401	0.15	21.865	1	1	3	5	7	5	7	1	3	7	6	1	22	0.036031	0.10669	0.010051
1	1	2.0143	0.064815	28.33	1	2	3	4	7	2	3	1	1	7	7	1	22	0.020792	0.23276	0.024219
1	15	0.003	0.33333	17.691	1	1	4	4	7	5	3	2	4	7	4	1	22	1.5313	1.72	0.33187
1	3	8.9317	0.13704	36.011	1	4	6	7	7	6	4	1	3	4	7	1	27	0.096692	1.3906	0.059125
1	10	1.1305	0.32963	42.319	0	1	3	3	7	7	7	1	3	3	7	1	19	3.1804	5.9561	1.1765
1	2	5.7004	0.083333	30.48	0	2	1	5	7	5	4	2	2	7	6	1	19	0.098264	0.96311	0.032852
1	5	2.1193	0.087037	30.15	0	4	3	4	7	1	2	1	4	7	7	1	22	0.93805	3.0387	0.47488
1	3	4.481	0.02037	37.34	0	2	2	2	7	4	6	1	4	7	6	1	NaN	0.15279	0.40491	0.075304
1	5	44.592	0.024074	23.533	0	2	5	3	6	3	2	4	2	2	6	1	30	0.32562	1.4073	0.16115
1	3	1.1165	0.16296	42.83	0	1	3	6	7	4	7	1	2	7	7	1	22	0.55437	2.251	0.24941
1	1	5.4724	0.19815	34.537	1	4	3	7	7	4	6	1	5	4	7	1	22	0.031128	0.070443	0.048895
1	5	2.7928	0.15	35.823	0	1	3	4	6	4	4	5	5	7	4	0	24	0.15881	0.17728	0.066106
1	2	1.1115	0.011111	21.498	0	2	4	5	6	3	6	3	5	5	6	1	22	0.18775	0.78672	0.026569
1	10	3.5759	0.16667	25.276	0	1	1	4	7	7	7	1	1	7	4	1	20	2.0359	0.31979	0.21032
1	10	4.0165	0.12963	24.398	1	2	3	3	7	4	4	1	3	7	5	0	19	1.5353	2.6161	0.73331
1	2	2.1245	0.081481	18.591	0	4	5	5	7	1	6	2	7	7	5	0	24	0.028904	0.35277	0.019066
0	2	60	0	17.137	0	7	7	4	7	4	4	2	4	4	6	0	22	0.0032132	0.01689	0.00599
1	1	24.479	0.040741	51.9	1	1	5	5	7	5	7	1	6	7	7	1	24	0.03495	0.057214	0.022932
1	2	2.1168	0.044444	40.309	0	5	6	6	7	5	7	6	6	1	7	1	18	0.033725	0.21656	0.022876
0	2	60	0	30.283	0	1	2	6	7	4	6	1	2	1	7	0	21	0.061885	1.5059	0.082362
1	15	1.4518	0.035185	54.28	1	3	3	3	7	5	5	1	3	7	7	1	21	1.7109	4.3286	1.2074
0	1	60	0	43.131	0	1	5	7	7	4	7	1	7	7	7	1	26	0.0044167	0.0054158	0.0024016
1	2	5.364	0.088889	40.547	0	7	1	3	7	2	6	2	3	7	7	1	23	0.067839	0.61773	0.083269
1	1	2.5711	0.057407	44.482	1	4	3	1	7	4	3	1	1	7	7	1	23	0.073508	0.043778	0.063682
1	2	0.6706	0.027778	34.566	1	2	4	6	7	3	6	1	1	4	6	1	21	0.085025	0.17731	0.032758
1	5	19.104	0.02037	47.176	0	1	3	4	7	5	7	1	5	7	7	1	45	0.25674	0.93995	0.1492
1	10	4.8161	0.088889	29.163	0	1	2	1	7	4	6	1	4	7	7	1	27	0.43748	2.3368	0.20379
0	1	60	0	14.088	0	4	6	6	6	4	6	5	6	6	5	0	22	0.0086752	0.0047368	0.0046513
1	2	29.014	0.0074074	15.795	0	1	2	4	7	5	4	1	4	6	4	0	22	0.018773	0.10241	0.015033
1	15	4.4675	0.096296	42.289	1	1	4	7	7	4	7	4	4	1	7	0	25	1.6487	4.2547	0.8238
1	1	3.1237	0.014815	20.461	0	2	1	4	7	3	5	1	1	4	7	0	21	0.042428	0.53271	0.011294
0	1	60	0	16.438	0	1	5	5	7	4	6	3	2	6	2	0	20	0.010707	0.077082	0.0073263
1	10	5.5815	0.15741	29.532	0	2	5	6	7	2	6	7	6	4	6	0	24	0.9074	1.6361	0.15438
1	5	1.6721	0.14074	39.932	1	1	2	6	7	3	6	1	1	7	7	0	23	1.0161	3.3462	0.51703
0	2	60	0	14.645	0	1	5	6	7	4	6	3	4	6	5	0	NaN	0.010418	0.018628	0.0070354
